# Supplementary material for: Mosquitoes Possess Specialized Cuticular Proteins That Are Evolutionarily Related to the Elastic Protein Resilin
Source: Insects. 2023 Dec 11;14(12):941. doi: 10.3390/insects14120941 (PMC10743668; doi:10.3390/insects14120941)
Supplement: Supplementary file 1 [file insects-14-00941-s001.zip]

Archive with 6 entries (6 files):
- FigS1-R&R-alignment.pdf
- FigS2-ChitinBindingAssay.pdf
- TableS1.xlsx
- TableS2.xlsx
- TableS3.xlsx
- TableS4.xlsx
