# Supplementary material for: Mosquitoes Possess Specialized Cuticular Proteins That Are Evolutionarily Related to the Elastic Protein Resilin
Source: Insects. 2023 Dec 11;14(12):941. doi: 10.3390/insects14120941 (PMC10743668; doi:10.3390/insects14120941)
Supplement: Supplementary file 1 [file insects-14-00941-s001.zip › TableS1.xlsx]

## Sheet: Sheet1
	Table S1. Primers and oligonucleotides used in this study.
	Species	Target	Primer/oligonucleotide name	Purpose	Sequence (5' to 3')
	An. stephensi	Aste_resilin-r	AsteResilin-r_F2	1st PCR for cDNA cloning	AAGCAGCACAAGTCGACACA
			AsteResilin-r_R1	1st PCR for cDNA cloning	TCAGATTCCAGCACGCCATT
			AsteResilin-r_pUCBmF3	2nd PCR for cDNA cloning	CGGTACCCGGGGATCCGCAGCACAAGTCGACACATA
			AsteResilin-r_pUCBmR2	2nd PCR for cDNA cloning	CGACTCTAGAGGATCCTCCTTTCCGGTAGAGTCATAGC
			AsteResilin-r_EcF1	Expression plasmid construction	CGGGAATTCGCTAAATATGAGTTTAGC
			AsteResilin-r_XhR1	Expression plasmid construction	GTGCTCGAGTCCTTCGTACGTAATTTT
	D. melanogaster	Dmel_resilin	DmelResilin_pUCBmF3	cDNA cloning	CGGTACCCGGGGATCCGCTTCAGCTTTAGATACCAGTGG
			DmelResilin_pUCBmR3	cDNA cloning	CGACTCTAGAGGATCCATGAGGGGCATAGGTAGGGG
			DmelResilin_EcF1	Expression plasmid construction	CGGGAATTCGCCAAGTACGAATTTAA
			DmelResilin_XhR1	Expression plasmid construction	GTGCTCGAGGCCTTCGTAGCGGATCTG
	T. castaneum	Tcas_CPR103	TcasResilin_F1	cDNA cloning	CGGCAGGTGGTGTGGTAATT
			TcasResilin_R1	cDNA cloning	CGAAGCAGTCGTCATAGTGT
	B. mori	Bmor_CPR139	BmorCPR139_pUCBmF2	cDNA cloning	CGGTACCCGGGGATCCGATTTTGCGTACGACGTGCA
			BmorCPR139_pUCBmR1	cDNA cloning	CGACTCTAGAGGATCCTACCGCCAAAAAGTCCCCAA
		Bmor_CPR140	BmorCPR140_pUCBmF1	cDNA cloning	CGGTACCCGGGGATCCTGACAAACATCCACACAAGGA
			BmorCPR140_pUCBmR1	cDNA cloning	CGACTCTAGAGGATCCAGAAAATTGCACAGTCGTT
			BmorCPR140_EcF1	Expression plasmid construction	CGGGAATTCGCAAAATACCAGTTTAGT
			BmorCPR140_XhR1	Expression plasmid construction	GTGCTCGAGACCCTCATATCGAATCTG
	At. rosae	Aros_resilin	ArosResilin_pUCBmF1	cDNA cloning	CGGTACCCGGGGATCCCCGCAAAACGTGTGACGATC
			ArosResilin_pUCBmR1	cDNA cloning	CGACTCTAGAGGATCCCGTTTATCATACGTGATTCAAATTTAACGA
	N/A	N/A	6xHis_NtF1	His-tag insertion	GGCCGCATCACCATCACCATCACTAGC
	N/A	N/A	6xHis_NtR1	His-tag insertion	GGCCGCTAGTGATGGTGATGGTGATGC
