# Supplementary material for: Mosquitoes Possess Specialized Cuticular Proteins That Are Evolutionarily Related to the Elastic Protein Resilin
Source: Insects. 2023 Dec 11;14(12):941. doi: 10.3390/insects14120941 (PMC10743668; doi:10.3390/insects14120941)
Supplement: Supplementary file 1 [file insects-14-00941-s001.zip › TableS2.xlsx]

## Sheet: Sheet1
	Table S2. Accession numbers of sequences used in this study.
	Taxonomy	Species	Group	Name	Accession number/ID
	Culicidae	Anopheles gambiae	I	Agam_CPR152	XM_024811314*2
			III	Agam_CPR147	XM_024811312*2
			IV	Agam_AGAP002367	XM_312588*2
			outgroup	Agam_CPR146	XM_024811313*2
		Anopheles stephensi	I	Aste_resilin-r	LC782961*1
			III	Aste_LOC118517694	XM_036064117*2
			IV	Aste_LOC118502851	XM_036035553*2
		Aedes aegypti	I	Aaeg_LOC5571033	XM_001659412*2
			III	Aaeg_LOC5571023	XM_021852767*2
			IV	Aaeg_LOC110681494	NM_001408449*2
		Culex pipiens pallens	I	Cppal_LOC120427988	XM_039592944*2
			III	Cppal_LOC120427992	XM_039592950*2
			IV	Cppal_LOC120422587	XM_052706275*2
	Nematocera	Lutzomyia longipalpis	II	Llon_LLOJ005918	LLOJ005918*3,4
			III	Llon_LLOJ005917	LLOJ005917*3
	Brachycera	Drosophila melanogaster	II	Dmel_resilin	LC782965*1
			III	Dmel_Cpr56F	NM_137626*2
			IV	Dmel_Muc91C	NM_142487*2,4
			outgroup	Dmel_Cpr50Ca	NM_137055*2
			outgroup	Dmel_Cpr50Cb	NM_137057*2
		Glossina morsitans	II	Gmor_GMOY004730	GMOY004730*3
			III	Gmor_GMOY009319	GMOY009319*3
	Coleoptera	Tribolium castaneum	II	Tcas_CPR103	LC782969*1
			III	Tcas_CPR17	NM_001167848*2
			IV	Tcas_LOC664382	XM_970389*2
			outgroup	Tcas_CPR28	XM_961627*2
		Anoplophora glabripennis	II	Agla_LOC108907992	XM_018711883*2
			III	Agla_LOC108911923	XM_018716999*2
	Lepidoptera	Bombyx mori	II	Bmor_CPR140	LC782962*1
			III	Bmor_CPR139	NM_001173161*2/LC782964*1
			IV	Bmor_LOC101740769	XM_021346356*2
		Spodoptera frugiperda	II	Sfru_LOC118265243	XM_035578046*2
			III	Sfru_LOC118276729	XM_050699961*2
	Hymenoptera	Athalia rosae	II	Aros_resilin	LC782967*1
			III	Aros_LOC105682962	XM_012395227*2
		Nasonia vitripennis	II	Nvit_CPR25	XM_008210874*2
			III	Nvit_CPR26	XM_016988249*2
			IV	Nvit_LOC100121527	XM_001605087*2
	*1: Cloned in this study.
	*2: NCBI Accession
	*3: VectorBase ID
	*4: Annotation was fixed to form proper signal peptide.
