# Supplementary material for: Mosquitoes Possess Specialized Cuticular Proteins That Are Evolutionarily Related to the Elastic Protein Resilin
Source: Insects. 2023 Dec 11;14(12):941. doi: 10.3390/insects14120941 (PMC10743668; doi:10.3390/insects14120941)
Supplement: Supplementary file 1 [file insects-14-00941-s001.zip › TableS3.xlsx]

## Sheet: Table S3
	Table S3. Structural features of studied proteins.
		Species	Registrated name*1	ID	Length (aa)	Signal peptide (position)	Conserved N-terminal sequence		R&R Consensus	Repeatitive sequence*2
							position	consensus: xxEPPVNSYLPPS		repeats	consensus sequence (N-terminal)	no. of N-terminal repeats	consensus sequence (C-terminal)	no. of C-terminal repeats
	Group I	Anopheles gambiae	CPR152	AGAP012487-RA	317	1:28	27:39	NSETPINSYLPPA	109:170	×
		Anopheles stephensi	resilin-r/HRGP	LOC118517690	313	1:28	27:39	EAEAPINSYLPPA	109:170	×
		Aedes aegypti	HRGP	LOC5571033	326	1:30	31:43	KPEAPVNSYLPPS	118:179	×
		Culex pipiens pallens	HRGP	LOC120427988	319	1:28	29:41	KPEAPVNSYLPPA	114:175	×
	Group II	Lutzomyia longipalpis	-	LLOJ005918	814	1:19	20:32	﻿RPEPPANTYLPPS	526:587	○	[S/G]QRPSSSYGPPGQGxGGG[G/S]GGxGG[G/A]	10	AGGYPSGGPGG	6
		Drosophila melanogaster	resilin	Dmel-CG15920	620	1:17	18:30	RPEPPVNSYLPPS	343:404	○	GGRPSDSYGAPGGGN	17	GYS[G/S]GRPGGQDLG	11
		Glossina morsitans	-	GMOY004730	574	1:16	17:29	RPEPPVNTYLPPS	354:415	○	GRPSSTYGAPG[S/G]GGGNG	13	YSxGxPNGxGGG	4
		Tribolium castaneum	CPR103	LOC100141989	545	1:18	19:29	EPPVNSYLPPS	365:426	○	GGGQNGGRPSSTYGPPGQGGNGF	10	NGGYPSGGPQGG	9
		Anoplophora glabripennis	pro-resilin-like	LOC108907992	479	1:18	19:29	EPPVNSYLPPS	349:410	○	GNG[R/K]P[S/G][S/P]VYGPP-NGN	8	-	-
		Bombyx mori	CPR140	-	485	1:18	19:29	EPPVNSYLPPS	264:325	○	GxPSS[S/G]YxP[P/S]	5	GYPSGG	4
		Spodoptera frugiperda	pro-resilin	LOC118265243	545	1:18	19:29	﻿EPPVNSYLPPS	269:330	○	GxPS[S/G][G/S][Y/S]	6	GYPSGGP	9
		Athalia rosae	pro-resilin	LOC105682963	673	1:16	17:29	﻿RPEPPVNSYLPPG	396:457	○	GRPSSSYGAPGAGG[N/G]GGG[G/F]GGGG[G/N]G	10	NGGY[P/S]SGGPGG[G/S]GGGGxGGGxG	8
		Nasonia vitripennis	CPR25	LOC100121101	786	1:16	17:29	﻿RPEPPVNSYLPPG	563:624	○	GRPSSSYGPP[S/G]xG[G/S]G	15	[G/A]GYPSGG[P/S]G	8
	Group III	Anopheles gambiae	CPR147	AGAP012462-RA	181	1:18	19:38	﻿EPPAPRNGFTSSSSNYLPPN	96:157	×
		Anopheles stephensi	pro-resilin	LOC118517694	181	1:18	19:38	EPPAPRNGFTSPSSNYLPPS	96:157	×
		Aedes aegypti	pro-resilin	LOC5571023	164	1:18	19:32	﻿EPPSPYSNYQQGGS	83:144	×
		Culex pipiens pallens	pro-resilin	LOC120427992	171	1:18	19:33	﻿RPEPPSPRSNYLPPN	88:149	×
		Lutzomyia longipalpis	-	LLOJ005917	280	1:18	19:31	﻿EPPVHGHNGHSSN	193:254	○	APSQQYG	7	-	-
		Drosophila melanogaster	Cpr56F	Dmel-CG9036	217	1:19	20:32	﻿EPPVPQNQYLPPN	126:187	×
		Glossina morsitans	-	GMOY009319	308	1:29	30:40	﻿EPPQNQYLPPN	184:245	○	GGPGGYSGG	6	-	-
		Tribolium castaneum	CPR17	LOC655183	192	1:16	17:29	﻿EPPVPSSQYLPSN	105:166	×
		Anoplophora glabripennis	pro-resilin-like	LOC108911923	174	1:16	17:29	﻿EPPVPSSEYLPAN	98:159	×
		Bombyx mori	CPR139	-	105	1:21	22:28	﻿QEYLPPK	42:103	×
		Spodoptera frugiperda	pro-resilin-like	LOC118276729	296	1:15	16:27	﻿EPPVDNRYLPPQ	206:267	〇	[A/S]PS[A/T]QYG	10	-	-
		Athalia rosae	SEC16-like	LOC105682962	331	1:15	16:26	﻿SLEPAGYRPPG	245:306	〇	[T/S]PSNQYLPA	9	-	-
		Nasonia vitripennis	CPR26	LOC100121152	209	1:19	20:30	﻿EPPVNQYLPPD	97:158	〇	-	-	YPSGGxGG	4
	Group IV	Anopheles gambiae	-	AGAP002367-RA	604	1:27	35:47	﻿APLPPSGSYLPPS	-	〇	AQ[T/A]PSSQYGAP			26
		Anopheles stephensi	pro-resilin	LOC118502851	641	1:26	35:47	﻿APLLPSGSYLPPS	-	〇	AQTPSSQYGAP			31
		Aedes aegypti	pro-resilin	LOC110681494	735	1:22	29:41	﻿EAPLPGGSYLPPS	-	〇	[G/S]APSQQYGAP			39
		Culex pipiens pallens	pro-resilin	LOC120422587	739	1:22	29:41	﻿EAPLPGGSYLPPS	-	〇	GGAPSSQYGAP			41
		Drosophila melanogaster	Muc91C	Dmel-CG7709	858	1:24	25:36	﻿EPPVNNAYLPPS	-	〇	A[P/A]PSSSYGAP			34
		Tribolium castaneum	pro-resilin	LOC664382	467	1:22	37:49	﻿PSGGPANSYLPPG	-	〇	GAPSQSYGAPSGGFGG			18
		Bombyx mori	pro-resilin	LOC101740769	443	1:16	17:28	﻿EPPVDSYSLSRS	-	〇	PSxxYGxP			12
		Nasonia vitripennis	pro-resilin	LOC100121527	441	1:23	24:36	﻿AEAPISGNYLPPS	-	〇	GxPSSSYGAPSxGG			21
	*1, Registered name in GenBank/EMBL/DDBJ or VectorBase. HRGP, histidine-rich glycoprotein. T. castaneum protein names are based on Dittmer et al., 2012.
	*2, Consensus of repetitive sequences located N-terminal and C-terminal to the R&R Consensus are shown. Invariant amino acids in repeats are indicated in bold.
