# Supplementary material for: Mosquitoes Possess Specialized Cuticular Proteins That Are Evolutionarily Related to the Elastic Protein Resilin
Source: Insects. 2023 Dec 11;14(12):941. doi: 10.3390/insects14120941 (PMC10743668; doi:10.3390/insects14120941)
Supplement: Supplementary file 1 [file insects-14-00941-s001.zip › TableS4.xlsx]

## Sheet: Table S4
	Table S4. Amino acid compositions of studied proteins.
		Species	Registrated name*1	ID	Amino acid composition (%)*2,3																				Length (aa)*2
					H	K	R	D	E	N	Q	S	T	Y	F	W	V	L	I	A	P	G	M	C
	Group I	Anopheles gambiae	CPR152	AGAP012487-RA	20.0692	2.42215	3.80623	9.34256	8.65052	7.95848	2.07612	8.3045	2.76817	5.88235	1.7301	0	1.38408	2.76817	2.07612	2.76817	5.53633	12.1107	0.346021	0	289
		Anopheles stephensi	resilin-r/HRGP	LOC118517690	21.7544	1.75439	3.85965	9.82456	7.7193	6.66667	1.40351	7.01754	2.80702	5.96491	1.75439	0	1.40351	2.10526	1.75439	3.50877	6.31579	14.0351	0.350877	0	285
		Aedes aegypti	HRGP	LOC5571033	24.3243	2.36486	3.71622	9.7973	8.78378	6.41892	1.35135	5.74324	2.02703	5.40541	1.68919	0	1.68919	2.36486	1.01351	2.36486	5.74324	14.8649	0.337838	0	296
		Culex pipiens pallens	HRGP	LOC120427988	23.0241	2.4055	3.78007	9.96564	8.59107	7.21649	2.06186	5.15464	2.4055	5.49828	1.37457	0	2.4055	2.06186	0.687285	3.43643	5.84192	13.7457	0.343643	0	291
	Group II	Lutzomyia longipalpis	-	LLOJ005918	0.13	0.38	2.77	1.89	0.88	1.13	6.67	14.47	1.64	4.03	5.79	0	0.63	0.5	0.5	7.67	10.69	40.25	0	0	795
		Drosophila melanogaster	resilin	Dmel-CG15920	0.165837	0.829187	5.97015	6.30182	1.3267	6.13599	5.3068	11.2769	1.16086	6.46766	0.829187	0	0.995025	1.82421	0.829187	4.80929	10.7794	34.8259	0.165837	0	603
		Glossina morsitans	-	GMOY004730	0.36	0.9	4.3	2.69	2.33	8.42	2.69	11.83	2.69	6.45	1.43	0	1.25	1.97	0.18	4.12	8.06	39.96	0.36	0	558
		Tribolium castaneum	CPR103	LOC100141989	1.13852	1.13852	2.46679	1.70778	2.46679	7.77989	7.21063	8.34915	3.03605	6.26186	2.27704	0	1.13852	1.13852	0.189753	0.948767	13.852	38.8994	0	0	527
		Anoplophora glabripennis	pro-resilin-like	LOC108907992	1.52	1.3	2.39	1.74	2.6	25.38	1.74	3.9	1.95	5.64	0.87	0	3.04	1.3	0.65	1.95	8.89	35.14	0	0	461
		Bombyx mori	CPR140	-	1.2848	1.2848	4.06852	3.64026	2.78373	9.42184	8.35118	17.5589	3.21199	4.06852	4.49679	0	1.71306	2.35546	0.214133	3.85439	7.28051	24.4111	0	0	467
		Spodoptera frugiperda	pro-resilin	LOC118265243	0.19	0.38	4.74	3.23	2.47	6.64	8.92	11.95	1.71	4.74	2.85	0	1.52	1.52	0.38	1.52	10.63	36.24	0.38	0	527
		Athalia rosae	pro-resilin	LOC105682963	0.152439	0.609756	2.9	1.8	2.1	8	1.06707	12.6	0.609756	4.42073	3.5	0	0.762195	0.457317	0.304878	4.2	7.3	49.3	0	0	661
		Nasonia vitripennis	CPR25	LOC100121101	0.13	0.65	2.99	2.73	1.56	6.88	5.45	12.08	0.26	4.29	4.55	0	0.78	0.65	0.26	5.58	10.52	40.52	0.13	0	770
	Group III	Anopheles gambiae	CPR147	AGAP012462-RA	0.61	1.23	3.68	6.13	4.91	16.56	5.52	8.59	4.29	10.43	4.29	0	3.68	2.45	1.23	4.29	7.36	14.11	0.61	0	163
		Anopheles stephensi	pro-resilin	LOC118517694	0.61	1.23	3.68	5.52	3.68	15.95	5.52	7.98	3.07	11.04	3.68	0	3.68	1.84	0.61	6.13	7.98	17.18	0.61	0	163
		Aedes aegypti	pro-resilin	LOC5571023	1.37	1.37	3.42	5.48	4.11	10.96	7.53	7.53	4.79	11.64	3.42	0	2.74	1.37	0.68	9.59	6.85	16.44	0.68	0	146
		Culex pipiens pallens	pro-resilin	LOC120427992	0.65	1.96	4.58	6.54	3.92	12.42	4.58	7.84	2.61	11.76	1.96	0	3.27	1.96	0.65	10.46	9.15	15.03	0.65	0	153
		Lutzomyia longipalpis	-	LLOJ005917	4.96	1.53	2.29	2.67	3.05	10.69	7.63	12.21	4.58	10.69	1.91	0	2.29	1.91	1.15	6.49	8.4	17.18	0.38	0	262
		Drosophila melanogaster	Cpr56F	Dmel-CG9036	0.51	2.53	4.04	4.55	4.55	11.62	8.59	5.05	1.52	9.6	2.02	0	3.03	3.54	2.02	6.06	10.1	20.2	0.51	0	198
		Glossina morsitans	-	GMOY009319	0.72	1.79	3.23	3.58	2.51	2.15	3.23	7.53	0.36	8.96	2.51	0	1.79	2.15	0.72	3.58	7.53	46.95	0.72	0	279
		Tribolium castaneum	CPR17	LOC655183	1.14	1.7	3.41	3.98	3.98	9.09	9.09	6.25	1.7	11.36	1.7	0	3.98	2.27	2.27	5.11	11.93	21.02	0	0	176
		Anoplophora glabripennis	pro-resilin-like	LOC108911923	1.27	4.43	1.9	4.43	5.7	5.06	6.96	5.7	1.9	12.03	2.53	0	5.06	5.06	1.9	6.96	15.19	13.92	0	0	158
		Bombyx mori	CPR139	-	3.57	8.33	2.38	9.52	5.95	3.57	5.95	4.76	2.38	8.33	3.57	0	7.14	10.71	1.19	7.14	8.33	7.14	0	0	84
		Spodoptera frugiperda	pro-resilin-like	LOC118276729	1.07	1.42	4.98	4.63	3.2	3.56	11.39	12.81	2.14	8.19	3.56	0	2.14	2.14	0.36	8.54	8.54	21	0.36	0	281
		Athalia rosae	SEC16-like	LOC105682962	1.27	2.53	5.7	3.48	4.75	7.59	7.59	15.19	4.43	9.81	1.27	0.32	3.8	3.8	2.53	9.81	9.18	6.96	0	0	316
		Nasonia vitripennis	CPR26	LOC100121152	0.53	1.58	4.21	4.74	3.68	4.74	7.37	5.79	1.58	8.95	2.63	0	3.16	3.16	1.05	4.21	12.63	28.95	1.05	0	190
	Group IV	Anopheles gambiae	-	AGAP002367-RA	1.2	0.172712	2.59067	0	0.172712	5.18135	11.5717	19.1	3.45423	7.08117	2.07254	0.172712	0.690846	0.863558	0	12.7	13.7	19.171	0	0	577
		Anopheles stephensi	pro-resilin	LOC118502851	0.650407	0.162602	2.43902	0	0.162602	4.87805	13.3333	20	3.90244	7.47967	1.78862	0.162602	0.650407	0.813008	0	11.7073	13.6585	18.2114	0	0	615
		Aedes aegypti	pro-resilin	LOC110681494	1.12045	0.140056	2.66106	0	0.140056	1.68067	13.5854	20.8	1.7	7.2	1.2605	0	0.70028	0.420168	0.140056	13.7255	14.5658	20.1681	0	0	713
		Culex pipiens pallens	pro-resilin	LOC120422587	0.139276	0.139276	2.36769	0	0.139276	6.68524	8.21727	17.6	0.97493	7.38162	0.557103	0	0.417827	0.278552	0.139276	13.5	15.3203	26.1	0	0	717
		Drosophila melanogaster	Muc91C	Dmel-CG7709	0.36	1.92	1.2	0.36	0.36	1.56	1.68	33.69	0.72	8.63	1.08	0	0.84	0.84	0.36	14.99	21.46	9.95	0	0	834
		Tribolium castaneum	pro-resilin	LOC664382	0.9	2.7	0.9	0.22	0	0.9	6.74	23.82	0.67	5.62	7.19	0	0.22	0.9	0	8.99	10.11	30.11	0	0	445
		Bombyx mori	pro-resilin	LOC101740769	2.11	3.75	5.62	5.62	6.32	4.68	5.85	16.16	3.98	7.49	2.58	0	4.68	4.92	0.7	8.2	8.67	8.43	0.23	0	427
		Nasonia vitripennis	pro-resilin	LOC100121527	0	0	2.63	0	0.24	3.11	0.48	27.51	0.72	6.7	5.02	0	0.24	0.48	0.24	10.05	13.16	29.43	0	0	418
	*1, Registered name in GenBank/EMBL/DDBJ. HRGP, histidine-rich glycoprotein. T. castaneum protein names are based on Dittmer et al., 2012.
	*2, Amino acid composition (%) and length (aa) after removal of the signal peptide.
	*3, The first to third most amino acid residures are marked with color.
